# CYTOTOXIC T-CELL ACTIVATION BY POLYRIBONUCLEOTIDES: DNA SYNTHESIS IS NOT REQUIRED\*

By PETER H. BICK† AND GÖRAN MÖLLER

(From the Department of Immunobiology, Karolinska Institute, Wallenberg Laboratory, Lilla  
Frescati, 104 05 Stockholm 50, Sweden)

The activation requirements of T lymphocytes, especially cytotoxic T lymphocytes, has been a matter of considerable controversy. Cytotoxic effector T cells have been shown to be specifically induced after *in vivo* or *in vitro* immunization and polyclonally induced by T-cell mitogens (1-3). T-cell cytotoxic capacity is found 5-7 days after alloimmunization or 24-48 h after mitogen activation. These results imply that some reprogramming of the cell is necessary before the expression of effector functions. Activation of cytotoxic T cells has been found to be enhanced by T-T cell collaboration (4-6), to be dependent of the presence of macrophages (7), and to require DNA synthesis and cell division (8-10).

T lymphocytes can be stimulated by complexes of synthetic polyadenylic:polyuridylic acid (poly A:U)<sup>1</sup> causing enhancement of T-cell helper activity (11, 12). Poly A:U enhancement of helper functions cannot be explained by a mitogenic effect of the polynucleotides on T lymphocytes and is probably due to a stimulated production of antigen-nonspecific T-cell factors (13, 14). Such factors also interfere with the induction of tolerance to a T-dependent antigen-soluble bovine gamma globulin (15, 16).

Poly A:U has been shown to enhance reactivity in mixed lymphocyte culture cell-mediated lympholysis and both poly A:U and the related complex of polyinosinic:polycytidylic acid delay tumor onset or growth in several systems (17-19). Since poly A:U's enhancing activity in humoral immune systems occurs early in the response, it is possible that this is the important time interval for enhancement of cell-mediated systems as well. Here we present evidence that poly A:U complexes cause polyclonal activation of cytotoxic T cells, in the absence of antigen, which can be demonstrated within 9-18 h *in vitro* against radiolabeled allogeneic target cells. The absence of a requirement for DNA synthesis, as well as the short time period necessary for the appearance of cytotoxic activity, suggests that the requirements for cytotoxic cell development may be less involved than was previously thought.

## Materials and Methods

**Animals.** A/sn, A.CA, B10.5M, CBA, (CBA × C57BL/10)F<sub>1</sub>, heterozygous Nude/+ on BALB/c background, and normal BALB/c mice were bred and maintained in our animal colony. Athymic

\* Supported by grants from the Swedish Cancer Society and the Swedish Medical Council.

† Postdoctoral Fellow of The Arthritis Foundation.

<sup>1</sup> *Abbreviations used in this paper:* BSS, balanced salt solution; Con A, concanavalin A; LPS, lipopolysaccharide; PBS, phosphate-buffered saline; PHA, phytohemagglutinin; poly A:U, polyadenylic:polyuridylic acid.

Nude BALB/c mice were obtained from Bomholtgård, Ry, Denmark. Animals were age- and sex-matched for each experiment.

**Spleen Cells.** Spleens were aseptically removed and cell suspensions prepared by means of teasing with sterile forceps. After brief sedimentation, the cells in the supernatant fluids were washed with balanced salt solution (BSS), resuspended in culture medium, counted, and adjusted to the appropriate concentration.

**Macrophage-Depleted Spleen Cells.** Macrophage-depleted spleen cells were prepared using the carbonyl iron method of Lundgren et al. (20). Carbonyl iron powder (0.2 g) (General Aniline and Film Corp., New York), sterilized by ultraviolet irradiation, was added to 20 ml of spleen cell suspension ( $2 \times 10^7$  cells/ml) in a 250 ml sterile flask. The mixture was incubated at 37°C for 30 min in a shaking water bath. After incubation, the iron-adherent cells were removed using a strong magnet and the remaining cells were washed three times with BSS, counted, and resuspended at the appropriate concentration in culture medium.

**Tumor Cells.** Moloney virus-induced leukemia cells YAC (*H-2<sup>a</sup>*) were obtained from the Department of Tumor Biology, Karolinska Institute, Stockholm, Sweden and were passaged in ascites form in A/sn mice. After removal from the peritoneal cavity, YAC cells were washed in BSS and resuspended in culture medium for labeling as described by Forman and Möller (21). Briefly, YAC cells ( $10^6$ /ml) were cultured in the presence of 0.05–0.1  $\mu$ Ci/ml  $^{125}$ I-5-iodo-2-deoxyuridine in a sterile flask at 37°C for 6 h on a rocking platform. Labeled cells were washed with BSS and resuspended at  $10^6$  cells/ml in culture medium. Routinely,  $10^6$  labeled cells contained 3,500–6,000 cpm.

**Culture Medium.** Mishell-Dutton culture medium was prepared from components purchased from Flow Laboratories, Irvine, Scotland and was supplemented with HEPES buffer (0.01 M; Flow Laboratories). All media contained 10% heat-inactivated fetal calf serum (Reheis lot N50003; Armour Pharmaceutical Co., Phoenix, Ariz.) unless otherwise noted.

**Polynucleotides.** Synthetic homopolymers of adenylic and uridylic acid were purchased from Miles Laboratories, Slough, England (lots 83,85 and 90,93,96, respectively). The homopolymers were dissolved in phosphate-buffered saline (PBS), pH 7.2, at 5 mg/ml. Complexes of poly A:U were prepared by mixing equal volumes of the individual homopolymer stock solutions at room temperature for 10 min. Poly A:U was then diluted in PBS to the desired concentration.

**Mitogens.** Concanavalin A (Con A) was purchased from Pharmacia Fine Chemicals Ltd., Uppsala, Sweden. Lipopolysaccharide (LPS) from *Escherichia coli* O55:B5 was obtained from Dr. T. Holme, Department of Bacteriology, Karolinska Institute, Stockholm, Sweden. Mitogens were dissolved in serum-free culture medium before use.

**Drugs and Chemicals.** Mitomycin C (Sigma Chemical Co., St. Louis, Mo.) was dissolved in sterile water and diluted in serum-free culture medium before use. Silica was a gift of Dr. B. Andersson, Department of Tumor Biology, Karolinska Institute, Stockholm, Sweden. Silica particles were suspended in BSS and heat sterilized before addition as fine suspensions to culture.

**Radioisotopes.**  $^{125}$ I-5-iodo-2-deoxyuridine (3.91  $\mu$ Ci/mmol) and  $^3$ H-methyl-thymidine (5  $\mu$ Ci/mmol) were purchased from The Radiochemical Centre Amersham, England. Radioisotopes were diluted in serum-free medium for addition to culture.

**Cytotoxic Assay.** To determine the cytotoxic response,  $10^7$  effector cells were cultured in 3-cm Petri dishes with  $10^5$  labeled target cells (optimal ratio) in a 1.0 ml vol for 15–18 h at 37°C in a rocking, gas-tight chamber containing 7% O<sub>2</sub>, 10% CO<sub>2</sub>, and 83% N<sub>2</sub> unless otherwise stated. After incubation, effector and target cells were resuspended using a rubber policeman, transferred to hemolysis tubes, centrifuged, and the supernatant fluids collected (Sup 1). Each cell pellet was resuspended in 0.3 ml of 0.25% trypsin for approximately 1 min to disrupt dead cells that had failed to lyse. 0.7 ml of BSS was then added to each tube to stop the reaction. The tubes were centrifuged as before and one-half the supernatant fluids collected (Sup 2). Tubes containing Sup 1, Sup 2, or the cell pellet were counted in a Nuclear Chicago gamma-spectrometer (Nuclear-Chicago Corp., Des Plaines, Ill.) and the percent isotope release calculated according to the following formula:

$$\% \text{ Isotope release} = (\text{Sup 1} + 2 \text{ Sup 2} - 3 \text{ Bg}) / (\text{Sup 1} + \text{Sup 2} + \text{Pellet} - 3 \text{ Bg}),$$

where Bg = machine background. In this system, background release (from control cultures) was in the range of 15–40%. Triplicate samples were assayed for each experimental group.

**Assay of DNA Synthesis.** Spleen cells ( $5 \times 10^5$ ) were cultured for 48 h in microplates (NUNC, Roskilde, Denmark) in 0.15 ml of culture medium containing the desired stimulating substance.

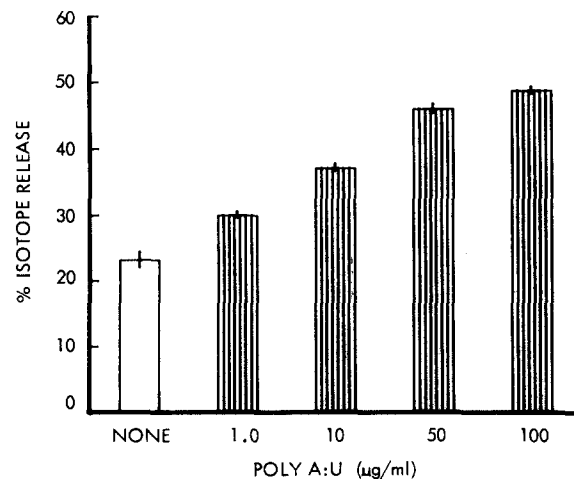

FIG. 1. Cytotoxic cell dose response to poly A:U.  $10^6$  million spleen cells were cultured with  $10^5$  YAC target cells in the presence (striped bars) or absence (open bar) of various concentrations of poly A:U. Cytotoxicity was assayed 18 h later. The mean response  $\pm$  standard error of triplicate samples is presented for each group.

18 h before harvest, [ $^3\text{H}$ ]thymidine ( $1.0 \mu\text{Ci}/0.02 \text{ ml/well}$ ) was added. Cultures were harvested onto glass fiber filters using a microharvester (Flow Laboratories), the filters were dried, and counted using a Packard liquid scintillation counter (Packard Instruments, Inc., Downers Grove, Ill.). The mean and standard error was calculated for data from triplicate samples.

## Results

**Activation of Cytotoxic Spleen Cells by Poly A:U.** To determine whether poly A:U could nonspecifically activate spleen cells to express cytotoxic effector functions, varying doses of poly A:U were added to  $10^7$  (CBA  $\times$  C57BL/10) $F_1$  spleen cells with  $10^5$  radiolabeled YAC target cells and cultured for 18 h. As seen in Fig. 1, an increase in cytotoxic capacity accompanied increasing poly A:U concentration up to  $100 \mu\text{g/ml}$ . In other experiments poly A:U doses from  $0.0001$  to  $0.1 \mu\text{g/ml}$  were found to slightly suppress the response while  $500 \mu\text{g/ml}$  caused no greater activation than did  $100 \mu\text{g/ml}$ . As a control for direct poly A:U toxicity,  $10^6$  YAC target cells were cultured alone or with  $100 \mu\text{g/ml}$  poly A:U in the standard culture system and assayed for isotope release after 18 h. Poly A:U was never observed to cause target cell death (see Fig. 2). Therefore, the observed cytotoxic effects were the result of poly A:U's stimulatory effect on the spleen cell population.

**Kinetics of Poly A:U-Induced Cytotoxicity.** Cytotoxic effector lymphocytes have been shown to be induced after 5–6 days in culture with allogeneic cells or after 1–2 days culture with Con A. Since the induction period of humoral immune responses can be shortened after poly A:U stimulation, it was of interest to determine the optimal time period for the induction and expression of cytotoxicity after poly A:U activation. Accordingly,  $10^7$  (CBA  $\times$  C57BL/10) $F_1$  spleen cells were incubated with  $100 \mu\text{g/ml}$  poly A:U and  $10^5$  labeled YAC target cells under standard culture conditions and cytotoxicity was measured at 3-h intervals from 6 to 24 h. As seen in Fig. 2, significant cytotoxicity, above unactivated control cultures, was observed after 12 h and continued to increase

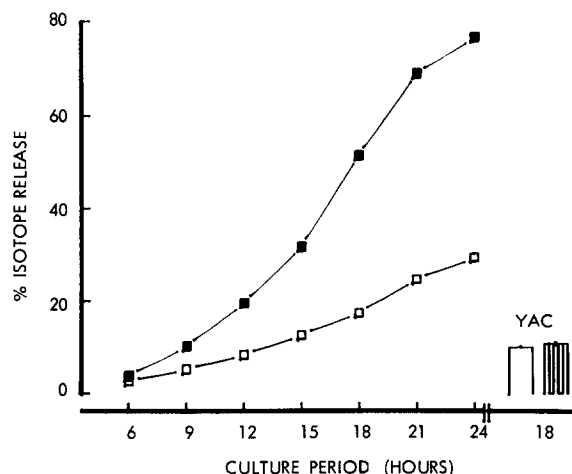

FIG. 2. Kinetics of poly A:U-induced cytotoxicity. 10 million spleen cells were cultured with  $10^6$  YAC target cells with (filled squares) or without (open squares) 100  $\mu\text{g/ml}$  poly A:U. Cytotoxicity was assayed at 3-h intervals. As a control for poly A:U toxicity,  $10^6$  YAC target cells were cultured with (striped bar) or without (open bar) 100  $\mu\text{g/ml}$  poly A:U and cytotoxicity was measured after 18 h. The mean response  $\pm$  standard error of triplicate cultures is presented for each group.

throughout the culture period. These results indicate that all the prerequisite cellular requirements for the induction and expression of cytotoxic cells can occur within 12–24 h after activation. Using chromium-labeled YAC target cells, activation and killing could be demonstrated within 8 h (% isotope release in activated cultures  $32.27 \pm 0.31$ , % background isotope release  $20.25 \pm 0.84$ ). Furthermore, poly A:U is capable of inducing cytotoxicity in a shorter time period than Con A in a similar system (3).

**Poly A:U Activation of Cytotoxic Cells is Antigen Independent.** Poly A:U has been shown to enhance T-lymphocyte helper functions in the absence of antigen (14). To test the capacity of poly A:U to stimulate cytotoxic cells in a similar fashion,  $10^7$  (CBA  $\times$  C57BL/10)F<sub>1</sub> spleen cells were incubated with 100  $\mu\text{g}$  poly A:U/ $10^7$  spleen cells/ml at 37°C in a shaking water bath for varying periods of time. After incubation, the cells were washed four times with BSS, resuspended to the original volume in fresh culture medium, and assayed for cytotoxic capacity. The results, Fig. 3, demonstrate that the spleen cells need only be exposed to poly A:U for 2 h to induce the same degree of cytotoxic potential that occurred when poly A:U was present throughout the culture period. Using  $^3\text{H}$ -poly A:U, the content of poly A:U remaining in the activated cell population was determined after incubation and washing. Less than 0.04  $\mu\text{g}$  poly A:U/ $10^7$  spleen cells remained after four washes. This dose is well below that necessary to cause activation. Therefore, we conclude that poly A:U activation of cytotoxic spleen cells occurs within 2 h and is antigen independent.

**Poly A:U-Induced Cytotoxicity is Dependent upon T Lymphocytes.** Since T and B lymphocytes, as well as macrophages, have been implicated as effector cells in various cytotoxic systems, it was important to determine which cell(s) was activated by poly A:U. Similarly, the possible requirement for macrophages needed clarification.

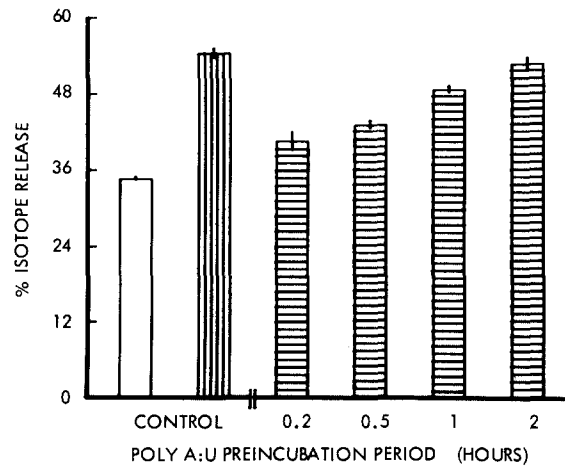

FIG. 3. Activation of cytotoxic cells by short-term incubation with poly A:U. Spleen cells ( $10^7$ /ml) were incubated with  $100 \mu\text{g/ml}$  poly A:U for various periods of time (horizontally striped bars). After incubation, the cells were washed in BSS, resuspended to the original volume, and cultured with  $10^5$  YAC target cells. For comparison,  $10^7$  spleen cells and  $10^5$  target cells were cultured with (vertically striped bar) or without (open bar)  $100 \mu\text{g/ml}$  poly A:U throughout the culture period. Cytotoxicity in all groups was assayed after 18 h. The mean response  $\pm$  standard error of triplicate cultures is presented for each group.

TABLE I  
Effect of T-Cell Depletion on Poly A:U-Induced Cytotoxicity

| Effector cells*  | % Isotope release† |            | % Net release§ |
|------------------|--------------------|------------|----------------|
|                  | Control            | Activated  |                |
| A                |                    |            |                |
| 1 CBA × C57BL/10 | 15.1 ± 1.0         | 36.6 ± 2.4 | 21.5           |
| BALB/c Nude/+    | 13.6 ± 0.3         | 37.5 ± 2.0 | 23.9           |
| BALB/c Nude      | 39.2 ± 1.0         | 48.2 ± 0.1 | 9.0            |
| 2 CBA × C57BL/10 | 33.6 ± 0.6         | 47.8 ± 0.7 | 14.2           |
| BALB/c Nude/+    | 15.5 ± 0.3         | 31.8 ± 0.4 | 16.3           |
| BALB/c Nude      | 18.3 ± 0.4         | 20.8 ± 0.6 | 2.5            |
| B                |                    |            |                |
| CBA normal       | 45.2 ± 0.7         | 87.1 ± 1.4 | 42.0           |
| CBA AT × BM      | 28.1 ± 1.3         | 42.4 ± 1.2 | 14.3           |

\* 10 million spleen cells were cultured with (activated) or without (control)  $100 \mu\text{g/ml}$  poly A:U and  $10^5$  YAC target cells.

$\dagger$  Cytotoxicity was measured after 18 h. The mean response  $\pm$  standard error of triplicate cultures is presented for each group.

$\S$  % Net release = % isotope release activated - % isotope release control.

To assess the necessity of thymus-derived spleen cells for the induction and expression of poly A:U-induced cytotoxicity, spleen cells from BALB/c Nude, BALB/c Nude/+ heterozygous, and (CBA  $\times$  C57BL/10) $F_1$  mice were cultured with  $100 \mu\text{g/ml}$  poly A:U and  $10^5$  YAC target cells. Cytotoxicity was measured after 18 h. The results, Table I, show that Nude spleen cells have an impaired cytotoxic potential when compared to Nude/+ heterozygous or normal spleen

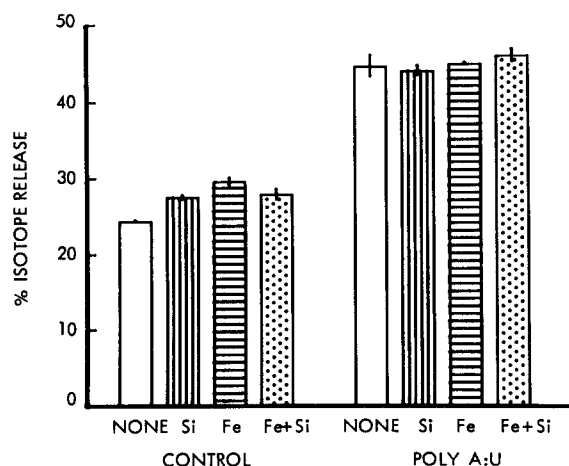

FIG. 4. Effect of macrophage depletion on poly A:U-induced cytotoxicity. 10 million normal (open bars) or iron-treated (Fe, horizontally striped bars) were incubated with or without 100  $\mu\text{g/ml}$  poly A:U for 2 h, washed four times in BSS, counted, and resuspended in fresh culture medium. Subsequently, poly A:U-activated or control cells were cultured with  $10^5$  YAC target cells in the presence (Si, vertical striped bars) or absence of silica (150  $\mu\text{g/ml}$ ). Iron-treated control or poly A:U-activated cells were also cultured in the presence of silica (Fe + Si, stippled bars). Cytotoxicity was measured after 18 h. The mean response  $\pm$  standard error of triplicate cultures is presented for each group.

cells. Similar results were obtained using spleen cells from adult-thymectomized, irradiated and bone marrow-reconstituted mice (AT  $\times$  BM) (Table I) although T-cell depletion in these animals was not complete. The mitogenic responsiveness of AT  $\times$  BM spleen cells to Con A was reduced to 20% of that seen in cultures of normal spleen cells. The LPS response, however, was unaffected. These results allow us to conclude that poly A:U-induced cytotoxicity is T-cell dependent.

In some systems the generation of T-cell-mediated responses requires the presence of macrophages or macrophage culture supernates (7, 22). The macrophage contribution to poly A:U-induced cytotoxicity was determined by removing macrophages using carbonyl iron, silica, or both combined. Macrophages were removed before and/or after spleen cell activation with poly A:U to probe the necessity of macrophages for induction and expression of cytotoxic cells in this system. 10 million normal or iron-treated (CBA  $\times$  C57BL/10) $F_1$  spleen cells were incubated with or without 100  $\mu\text{g/ml}$  poly A:U for 2 h at 37°C, washed four times, counted, and resuspended to the original concentration. To assess the possible effector function of macrophages, poly A:U-activated or control cells were cultured with or without 150  $\mu\text{g/ml}$  silica and  $10^5$  YAC target cells in the standard assay system. Silica has been shown to be selectively toxic for cultured macrophages and this dose of silica abolishes the primary *in vitro* immune response to sheep erythrocytes and prevents the development of mature macrophages from precursor cells (23, 24). The results from one such experiment are presented in Fig. 4. The depletion of macrophages before or after poly A:U activation had no effect upon the observed cytotoxicity. A slight increase in the background cytotoxicity is seen after macrophage depletion.

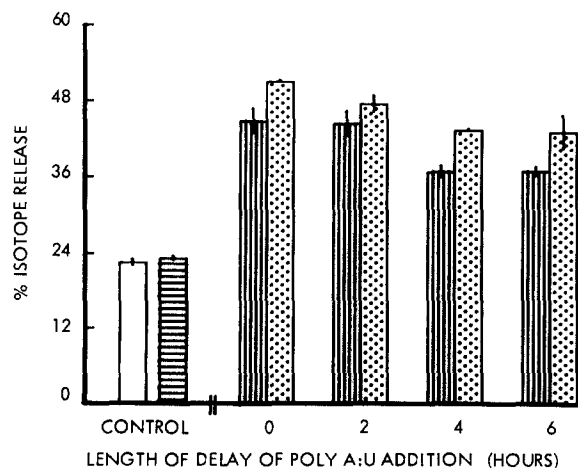

FIG. 5. Effect of silica addition to culture before poly A:U activation. 10 million spleen cells were cultured with (stippled bars) or without (vertical striped bars) silica ( $150 \mu\text{g/ml}$ ) for 0–6 h before the addition of  $100 \mu\text{g/ml}$  poly A:U. Control cells were cultured with (horizontally striped bars) or without silica (open bar) but did not receive poly A:U. YAC target cells ( $10^5$ ) were added 6 h after culture initiation and cytotoxicity was assayed 18 h later. The mean response  $\pm$  standard error of triplicate cultures is presented for each group.

Since macrophage depletion by silica may require a short time period to be complete, spleen cells were exposed to silica for varying periods of time before activation. 10 million spleen cells were cultured with or without  $150 \mu\text{g/ml}$  silica for 0–6 h before the addition of  $100 \mu\text{g/ml}$  poly A:U. YAC target cells ( $10^5$ ) were added 6 h after the initiation of culture and cytotoxicity was assayed 18 h later. As shown in Fig. 5, normal spleen cells cultured in the absence of silica were capable of being activated when poly A:U was added at the initiation of culture or 6 h later. Addition of silica at 0 time served only to slightly enhance the cytotoxic response at each time period. However, silica had no effect on background cytotoxicity in control cultures indicating that silica was not toxic for the YAC target cells nor could silica activate cytotoxic cells itself. Silica was capable of exerting its macrophage-depleting effect within 2 h as determined by the abolition of mitogenic responsiveness of spleen cells to dextran sulfate. The latter response has been shown to be macrophage dependent (U. Perrson, personal communication).

From these results it can be concluded that splenic T cells are required for the development of poly A:U-induced cytotoxicity. Furthermore, activation and expression of the cytotoxic cell population does not require macrophages.

**Specificity of Poly A:U-Activated Cytotoxic Cells.** Since poly A:U has been shown to be capable of inducing cytotoxic cells in the absence of antigen, it became important to determine the specificity of killing by these cells. If poly A:U activation of T cells is polyclonal it would be expected that cytotoxic cells, capable of killing YAC target cells ( $H-2^a$ ), could be induced in all strains allogeneic to the target. To test this hypothesis,  $10^7$  spleen cells from A/sn ( $H-2^a$ ), A.CA ( $H-2^f$ ), B10.5M ( $H-2^b$ ), CBA ( $H-2^k$ ), or (CBA  $\times$  C57BL/10)F<sub>1</sub> ( $H-2^{k/b}$ ), mice were cultured with  $10^5$  YAC target cells for 18 h with or without poly A:U and assayed as usual. Spleen cells from all strains allogeneic to the target were

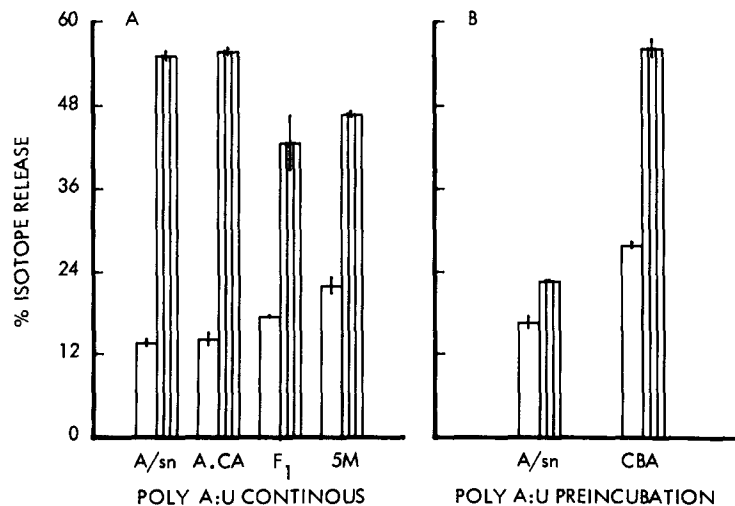

FIG. 6. Effect of short-term poly A:U activation on the ability to kill syngeneic target cells. 10 million spleen cells were cultured with  $10^5$  YAC target cells in the presence (striped bars) or absence (open bars) of 100  $\mu$ g/ml poly A:U (A). In another experiment, spleen cells ( $10^7$ /ml) were incubated with (striped bars) or without (open bars) 100  $\mu$ g/ml poly A:U, washed seven times in BSS, resuspended in fresh medium, and cultured with  $10^5$  YAC target cells (B). In both experiments cytotoxicity was assayed after 18 h. The mean response  $\pm$  standard error of triplicate cultures is presented for each group.

capable of killing. Surprisingly, syngeneic A/sn spleen cells also demonstrated cytotoxic activity in the presence of poly A:U (Fig. 6 A). This syngeneic killing may be the result of cytotoxic A/sn spleen cells, specific for allogeneic *H-2* haplotypes, causing nonspecific lysis after being brought into contact with the target cell by cell-bound poly A:U. A similar situation has been shown to exist in Con A-induced cytotoxic systems (3, 25). However, if the spleen cells were activated by a 2 h exposure to poly A:U and washed extensively to remove the cell-bound polynucleotides, only cells allogeneic to the target were capable of killing (Figure 6 B). Therefore, poly A:U induces cytotoxic cells capable of killing allogeneic but not syngeneic target cells in the absence of a nonspecific binding ligand. This suggests that the activation of cytotoxic cells by poly A:U is most likely polyclonal.

**Activation of Cytotoxic Cells does not Require DNA Synthesis.** It has been reported that DNA synthesis is required for the generation of cytotoxic cells by alloantigens or mitogens (8–10). In contrast, there is at least one report of cytotoxic cell activation independent of DNA synthesis (26, 27). To determine whether DNA synthesis accompanied poly A:U activation of cytotoxic cells, normal A/sn or CBA spleen cells were activated by poly A:U (100  $\mu$ g/ml) during a 2 h incubation at 37°C. After seven washes with BSS, control and activated cells were assayed for cytotoxic and DNA synthetic activity. Cytotoxicity was measured after 18 h while DNA synthesis was assayed after 48 h. As shown in Fig. 7, poly A:U-activated cells did not incorporate [ $^3$ H]thymidine. However, cultures of activated cells responded to both LPS and Con A, indicating that activated cells were capable of synthesizing DNA and that poly A:U activation did not interfere with incorporation of [ $^3$ H]thymidine. That cytotoxic cells were



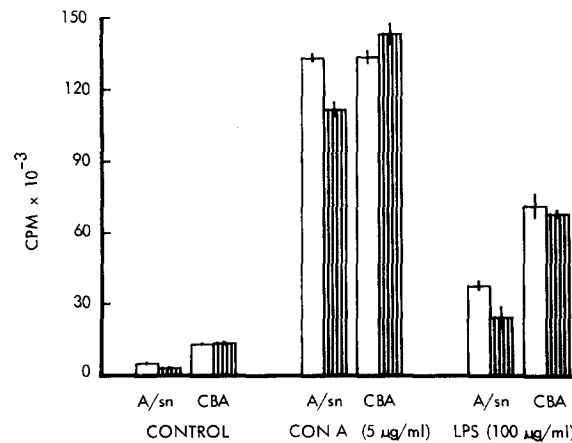

FIG. 7. Effect of poly A:U activation on DNA synthesis. 10 million A/sn or CBA spleen cells were incubated with (striped bars) or without (open bar) 100  $\mu\text{g/ml}$  poly A:U for 2 h. After seven washes in BSS, the cells were resuspended to the original volume and cultured alone or with 5  $\mu\text{g/ml}$  Con A or 100  $\mu\text{g/ml}$  LPS in microcultures ( $5 \times 10^5$  cells/well) for 48 h.  $^3\text{H}$ -thymidine was added 18 h before harvest. The mean response  $\pm$  standard error of triplicate samples is presented for each group.

indeed activated is reflected in the level of cytotoxicity observed. A/sn spleen cells expressed a net cytotoxicity of 2% (28% activated – 26% control) while allogeneic CBA spleen cells gave a net cytotoxicity of 25% (65% activated – 40% background). Similar results were seen when unlabeled YAC cells were present in the mitogen-stimulated cultures, indicating that target cells did not affect the ability to measure DNA synthesis.

Results from experiments in which mitomycin C was used to block DNA synthesis before activation show that the induction of cytotoxicity was not inhibited while DNA synthetic responses to Con A and LPS were abolished (Table II). In these experiments, B10.5M spleen cells ( $2 \times 10^7/\text{ml}$  in serum-free media) were incubated with mitomycin C for 45 min at  $37^\circ\text{C}$ . After two washes to remove excess mitomycin C, treated or normal spleen cells were cultured with or without 100  $\mu\text{g/ml}$  poly A:U and assayed for cytotoxic activity against  $10^5$  YAC target cells. As a control for the inhibition of DNA synthesis, mitomycin C-treated or normal spleen cells were activated with Con A or LPS and incorporation of [ $^3\text{H}$ ]thymidine was measured after 48 h. Mitomycin C pretreatment did not inhibit net cytotoxic activity but eliminated mitogen responsiveness. Mitomycin C did not affect the release of isotope from YAC targets since background cytotoxicity did not increase; actually it was reduced. Spleen cells, incapable of DNA synthesis, were competent to mount a cytotoxic response after poly A:U activation.

### Discussion

We have described a new system in which the activation requirements of cytotoxic cells can be examined over a short time period independent of antigen. Optimal activation of cytotoxic cells occurred after a 2 h exposure to poly A:U and could be demonstrated after a 9–12 h incubation with allogeneic target cells.

TABLE II  
Effect of Inhibition of DNA Synthesis on Poly A:U-Induced Cytotoxicity

| Mitomycin<br>C*  | % Isotope release |                | % Net<br>release<br>‡ | Con A§  |                         | LPS§   |                              |
|------------------|-------------------|----------------|-----------------------|---------|-------------------------|--------|------------------------------|
|                  | Control           | Activated      |                       | cpm     | % Inhi-<br>bi-<br>tion¶ | cpm    | % In-<br>hi-<br>bi-<br>tion¶ |
| $\mu\text{g/ml}$ |                   |                |                       |         |                         |        |                              |
| 0                | 34.9 $\pm$ 0.2    | 64.2 $\pm$ 0.8 | 29                    | 110,687 | 0                       | 92,589 | 0                            |
| 15               | 25.5 $\pm$ 0.3    | 47.0 $\pm$ 2.9 | 22                    | 3,633   | 97                      | 23     | 100                          |
| 20               | 24.7 $\pm$ 0.3    | 42.7 $\pm$ 1.3 | 20                    | 898     | 100                     | 69     | 100                          |
| 25               | 26.2 $\pm$ 0.7    | 41.3 $\pm$ 0.9 | 16                    | 262     | 100                     | 0      | 100                          |

\* Spleen cells ( $2 \times 10^7/\text{ml}$ ) were incubated with mitomycin C in serum-free medium for 45 min at 37°C and washed twice.

‡ % Net release = % isotope release from cultures containing activated cells – % isotope release from cultures containing control cells.

§ 1.0  $\mu\text{g/ml}$  Con A or 100  $\mu\text{g/ml}$  LPS were added to cells in microculture ( $5 \times 10^5$  cells/well).

|| Background subtracted.

¶ % Inhibition = cpm from cultures of treated cells/cpm from control cultures (no mitomycin C treatment).

Maximal cytotoxicity was seen after 21–24 h in culture. The short time period required for induction and expression of cytotoxicity suggests that few requirements need be met for activation to occur. Indeed, using  $^{51}\text{Cr}$ -labeled target cells activation and killing could be observed within 8 h. In contrast, alloantigen activation requires a number of days and is enhanced by cellular cooperation (4–8) while polyclonal stimulation by Con A requires 24 h to develop maximal cytotoxicity (3). Furthermore, activation by alloantigens or Con A has been reported to require DNA synthesis and/or cell division (8–10). Synthesis of DNA is not required for poly A:U-activated cytotoxicity since DNA synthesis does not occur after poly A:U stimulation and inhibition of DNA synthesis does not inhibit the response. Because of the short time interval between activation and assay (15–18 h) in this system, a role for cell cooperation seems unlikely but is not ruled out.

That the cytotoxic effects observed are dependent upon T lymphocytes is supported by the experiments using Nude or AT  $\times$  BM mice as a source of effector cells. The potential for development of cytotoxicity is lost or dramatically reduced in animals depleted of T cells. The removal of macrophages did not affect, or slightly enhanced, the activation or expression of poly A:U-induced cytotoxicity. This eliminates the macrophage as the effector cell and rules out any helper cell role.

Poly A:U activates effector cells polyclonally since spleen cells allogeneic to the target (non-*H-2<sup>a</sup>*) cause target cell lysis after activation while A/sn cells do not. However, if poly A:U is present in the assay culture nonspecific lysis will occur; A/sn spleen cells kill YAC. This is probably due to poly A:U acting as a binding agent between activated killer cells and syngeneic targets. A similar situation exists in lectin-induced cytotoxic systems and is due to nonspecific killing of targets by effector cells lacking clonally distributed recognition receptors (3, 25).

Target and effector cell incompatibility at *H-2* is sufficient for poly A:U-induced cytotoxicity to be expressed. Thus, spleen cells from A.CA (*H-2<sup>f</sup>*), sharing the background but not the *H-2* genetic component with the YAC target (*H-2<sup>a</sup>*), are competent to lyse the target in the absence of any binding ligand (unpublished observation). Whether other antigens contribute to killing in a totally allogeneic situation is not known.

It appears most likely that poly A:U is activating cytotoxic T cells directly and polyclonally. Poly A:U activation is fundamentally different from primary alloantigen or lectin activation in that the induction period is very short and DNA synthesis is not required. These results are in sharp contrast with those of Nedrud et al. and Heininger et al. who state that DNA synthesis is obligatory for cytotoxic cell activation by alloantigens (9) or Con A (10), respectively. However, attempts to demonstrate poly A:U mitogenicity for T cells have been unsuccessful (reference 13, and data reported here). It is possible that poly A:U activates the same T-cell populations activated by alloantigens or Con A but triggering occurs at a later stage in the activation pathway requiring few steps to full activation. Alternatively, poly A:U may activate only relatively mature cells that do not require DNA synthesis or cell division to express cytotoxic functions. Since this induction is polyclonal, a large proportion of T cells should be activated, abrogating the need for clonal expansion required in an antigen-dependent clonally restricted response. A similar situation exists in the secondary CML response where cytotoxic cells are rapidly induced in the absence of DNA synthesis (27).

Poly A:U has been shown to polyclonally activate T cells to produce nonspecific factors capable of enhancing humoral immune responses *in vitro* as well as blocking the induction of tolerance to soluble bovine gamma globulin *in vivo* (14, 15). The findings reported here confirm poly A:U's activity as a polyclonal T-cell activator and extend earlier findings to include activation of cell-mediated cytotoxic responses. Furthermore, these observations suggest that the adjuvant activity of poly A:U is due to polyclonal T-cell stimulation. Such polyclonal stimulation is likely to activate cells with suppressive as well as helper activity, the overall response being a result of a balance between help vs. suppression (C. W. Morris and A. G. Johnson, personal communication).

Since poly A:U activates cytotoxic lymphocytes in the absence of DNA synthesis, this system offers the opportunity to study activation independent of nonessential cellular functions accompanying other forms of stimulation. Findings similar to ours have been reported using human peripheral blood lymphocytes and phytohemagglutinin (PHA) in a short-term killing assay against human fibroblast monolayers (26). In that system, killing was nonspecific since PHA was present throughout the assay and the effector cells were not delineated. However, activation and killing was independent of DNA, RNA, and protein synthesis although metabolic activity was required (26). Whether other similarities exist between their results and those reported here cannot be determined.

Using poly A:U's ability to directly activate cytotoxic T cells, one can investigate whether the absence of cytotoxic reactivity in experimentally induced tolerant situations is due to a lack of potential effector cells, active suppression, or the result of a helper cell defect. We are presently investigating such situations.

### Summary

We have shown that cytotoxic T cells can be polyclonally activated by a short exposure to complexes of polyadenylic:polyuridylic acid (poly A:U). Activation is optimal at a dose of 100  $\mu\text{g/ml}$  poly A:U and occurs during a 2 h incubation period in the absence of antigen. Killing of allogeneic, but not syngeneic, target cells can be observed after 12 h in culture and peaks after 21–24 h in the absence of any nonspecific binding ligand. The observed cytotoxicity is mediated by T lymphocytes and does not require accessory macrophages or DNA synthesis for the activation or expression of effector functions. These results suggest that few requirements exist for the activation of cytotoxic T cells.

*Received for publication 28 April 1977.*

### References

1. Perlmann, P., and G. Holm. 1969. Cytotoxic effects of lymphoid cells in vitro. *Adv. Immunol.* 11:117.
2. Cerottini, J.-C., and T. Brunner. 1974. Cell-mediated cytotoxicity, allograft rejection, and tumor immunity. *Adv. Immunol.* 18:67.
3. Waterfield, J. D., E. M. Waterfield and G. Möller. 1975. Lymphocyte mediated cytotoxicity against tumor cells. I. Con A activated cytotoxic effector cells exhibit immunologic specificity. *Cell. Immunol.* 17:392.
4. Wagner, H. 1973. Synergy during in vitro cytotoxic allograft responses. I. Evidence for cell interaction between thymocytes and peripheral T cells. *J. Exp. Med.* 138:1379.
5. Cantor, H., and E. A. Boyse. 1975. Functional subclasses of T lymphocytes bearing different Ly antigens. II. Cooperation between subclasses of  $\text{Ly}^+$  cells in the generation of killer activity. *J. Exp. Med.* 141:1390.
6. Bach, F. H. 1976. Aspects of mixed leucocyte culture and cell mediated lympholysis. In *The Role of Products of the Histocompatibility Gene Complex in Immune Responses*. D. H. Katz and B. Benacerraf, editors. Academic Press, Inc., New York. 103.
7. Wagner, H., M. Feldmann, W. Boyle, and J. W. Schrader. 1972. Cell-mediated immune response in vitro. III. The requirement for macrophages in cytotoxic responses against cell-bound and subcellular antigens. *J. Exp. Med.* 136:331.
8. Cantor, H., and J. Jandinski. 1974. The relationship of cell division to the generation of cytotoxic activity in vitro. *J. Exp. Med.* 140:1712.
9. Nedrud, J., M. Touton, and W. R. Clark. 1975. The requirement for DNA synthesis and gene expression in the generation of cytotoxicity in vitro. *J. Exp. Med.* 142:960.
10. Heininger, D., M. Touton, A. K. Chakravarty, and W. R. Clark. 1976. Activation of cytotoxic function in T lymphocytes. *J. Immunol.* 117:2175.
11. Cone, R. E., and A. G. Johnson. 1973. Regulation of the immune system by synthetic polynucleotides. IV. Amplification of the proliferation of thymus-influenced lymphocytes. *Cell. Immunol.* 3:283.
12. Cone, R. E., and J. J. Marchalonis. 1972. Adjuvant action of poly (A:U) on T-cells during the primary immune response in vitro. *Aust. J. Exp. Biol. Med. Sci.* 50:69.
13. Johnson, A. G., and I. H. Han. 1974. Mitogenic activity of polynucleotides on thymus-influenced lymphocytes. In *C-AMP, Cell Growth, and The Immune Response*. W. Braun, L. M. Lichtenstein, and C. W. Parker, editors. Springer-Verlag New York Inc., New York. 77.
14. Bick, P. H., and A. G. Johnson. 1975. Homopolyribonucleotide induced secretion of

- immunocompetent cell enhancing factors from mouse thymocytes. *Fed. Proc.* 34:1010.
15. Capanna, S. L., and Y. M. Kong. 1974. Further studies on the prevention of tolerance induction by poly A:U. *Immunology.* 27:647.
  16. Capanna, S. L., Y. M. Kong, P. H. Bick, and A. G. Johnson. 1976. Prevention of T cell tolerance by poly A:U induced thymocyte fluid. *Fed. Proc.* 35:434.
  17. Wagner, H., and R. E. Cone. 1974. Adjuvant effect of poly (A:U) upon T cell-mediated in vitro cytotoxic allograft responses. *Cell. Immunol.* 10:394.
  18. Levy, B. H., R. Adamson, P. Carvone, V. DeVita, A. Gadzar, J. Rhim, A. Weinstein, and F. J. Riley. 1971. Studies on the anti-tumor action of poly I:poly C. In *Biological Effects of Polynucleotides*. R. F. Beers, and W. Braun, editors. Springer-Verlag New York Inc., New York. 55.
  19. Lacour, F., A. Spira, J. Lacour, and M. Prade. 1972. Polyadenylic:polyuridylic acid, an adjunct of surgery in the treatment of spontaneous mammary tumors in C3H/He mice and transplantable melanoma in the hamster. *Cancer Res.* 32:648.
  20. Lundgren, G., C. H. F. Zukoski, and G. Möller. 1968. Differential effects of human granulocytes and lymphocytes on human fibroblasts in vitro. *Clin. Exp. Immunol.* 3:817.
  21. Forman, J., and G. Möller. 1973. Generation of cytotoxic lymphocytes in mixed lymphocyte reactions. I. Specificity of the effector cells. *J. Exp. Med.* 138:672.
  22. Bach, F. H., B. J. Alter, S. Solliday, D. C. Zoshke, and M. Janis. 1970. Lymphocyte reactivity in vitro. II. Soluble reconstituting factor permitting response of purified lymphocytes. *Cell Immunol.* 1:219.
  23. Lemke, H., and H-G. Opitz. 1976. Function of 2-mercaptoethanol as a macrophage substitute in the primary immune response in vitro. *J. Immunol.* 117:388.
  24. Allison, A. C., J. S. Harrington, and M. Birbeck. 1966. An examination of the cytotoxic effects of silica on macrophages. *J. Exp. Med.* 124:141.
  25. Bevan, M. J., R. E. Langman, and M. Cohn. 1976. H-2 antigen specific cytotoxic T cells induced by concanavalin A: estimation of their relative frequency. *Eur. J. Immunol.* 6:150.
  26. Lundgren, G. and G. Möller. 1969. Non-specific induction of cytotoxicity in normal human lymphocytes in vitro: studies of mechanism and specificity of the reaction. *Clin. Exp. Immunol.* 4:435.
  27. MacDonald, H. R., B. Sordat, J. C. Cerottini, and K. T. Brunner. 1975. Generation of cytotoxic T lymphocytes in vitro. IV. Functional activation of memory cells in the absence of DNA synthesis. *J. Exp. Med.* 142:622.
